# Supplementary material for: Cationic poly(amino acid) surface functionalized manganese nanoparticles for nitric oxide-based immunotherapy and magnetic resonance imaging
Source: Royal Society of Chemistry journal article supplement (doi:10.1039/d2tb00794k), 2022-01-01
Supplement: d2tb00794k1.pdf [file d2tb00794k1.pdf]

## Supporting Information

# Cationic Poly(amino acid) Surface Functionalized Manganese Nanoparticles for Nitric Oxide-Based Immunotherapy and Magnetic Resonance Imaging

*Jong-Woo Lim, Hye Young Son, Yong-Min Huh\* and Seungjoo Haam\**

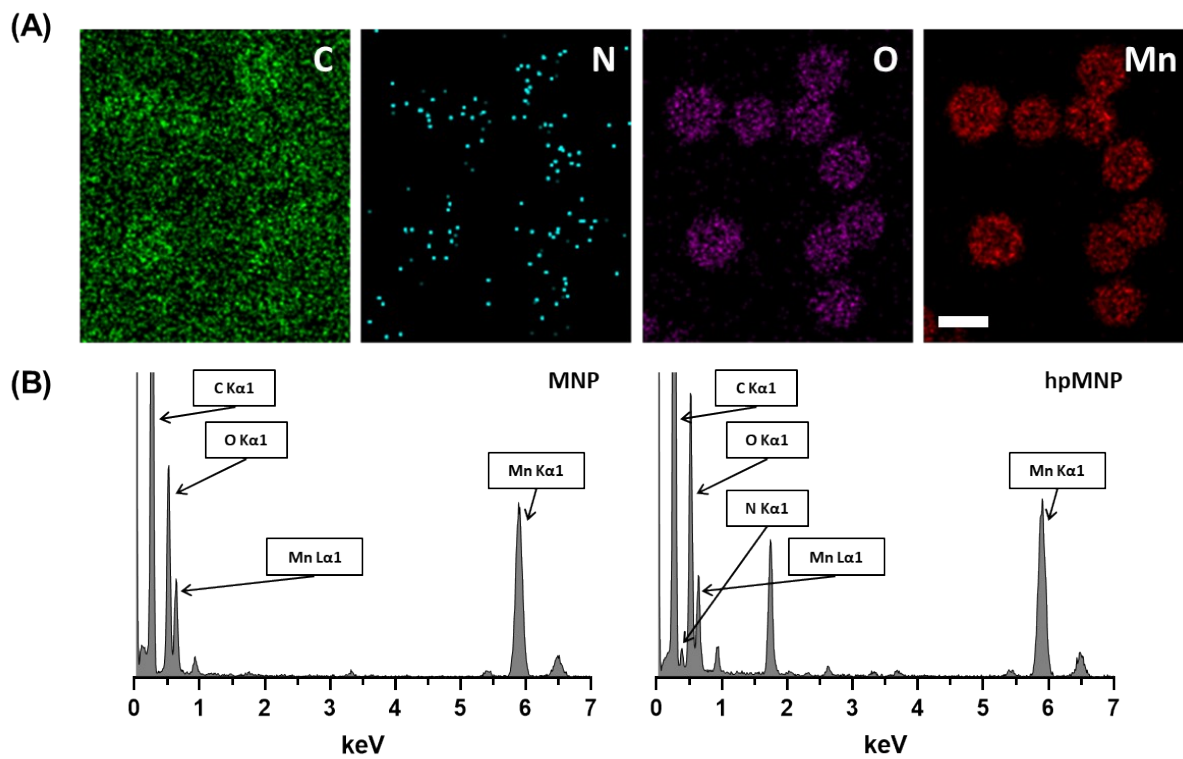

**Figure S1.** (a) STEM-EDS elemental maps of the MNPs. The scale bar in the image for EDS maps is 100 nm. (b) EDS spectrum data representative of MNPs and hpMNPs.

| Element | Weight | Atomic % |
|---------|--------|----------|
|---------|--------|----------|

|           | <b>(%)</b>   |              |
|-----------|--------------|--------------|
| <b>C</b>  | <b>65.92</b> | <b>80.22</b> |
| <b>N</b>  | <b>0</b>     | <b>0</b>     |
| <b>O</b>  | <b>15.55</b> | <b>15.12</b> |
| <b>Mn</b> | <b>17.53</b> | <b>4.66</b>  |

**Table S1.** Quantitative data for the elements in MNPs, as obtained after EDS mapping.

| <b>Element</b> | <b>Weight (%)</b> | <b>Atomic %</b> |
|----------------|-------------------|-----------------|
| <b>C</b>       | <b>66.47</b>      | <b>78.75</b>    |
| <b>N</b>       | <b>2.21</b>       | <b>2.24</b>     |
| <b>O</b>       | <b>17.28</b>      | <b>15.37</b>    |
| <b>Mn</b>      | <b>14.05</b>      | <b>3.64</b>     |

**Table S2.** Quantitative data for the elements in hpMNPs, as obtained after EDS mapping.

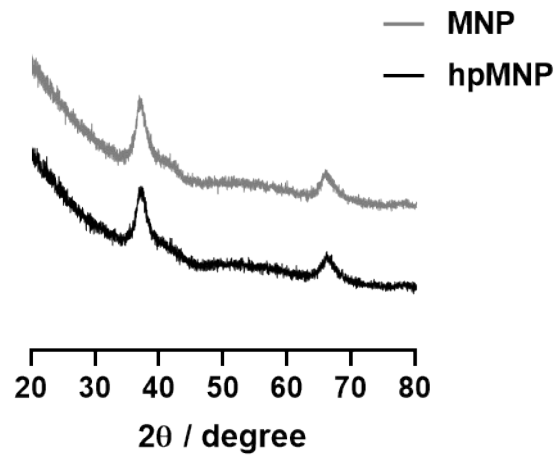

**Figure S2.** XRD spectra for MNPs (grey) and hpMNPs (black).

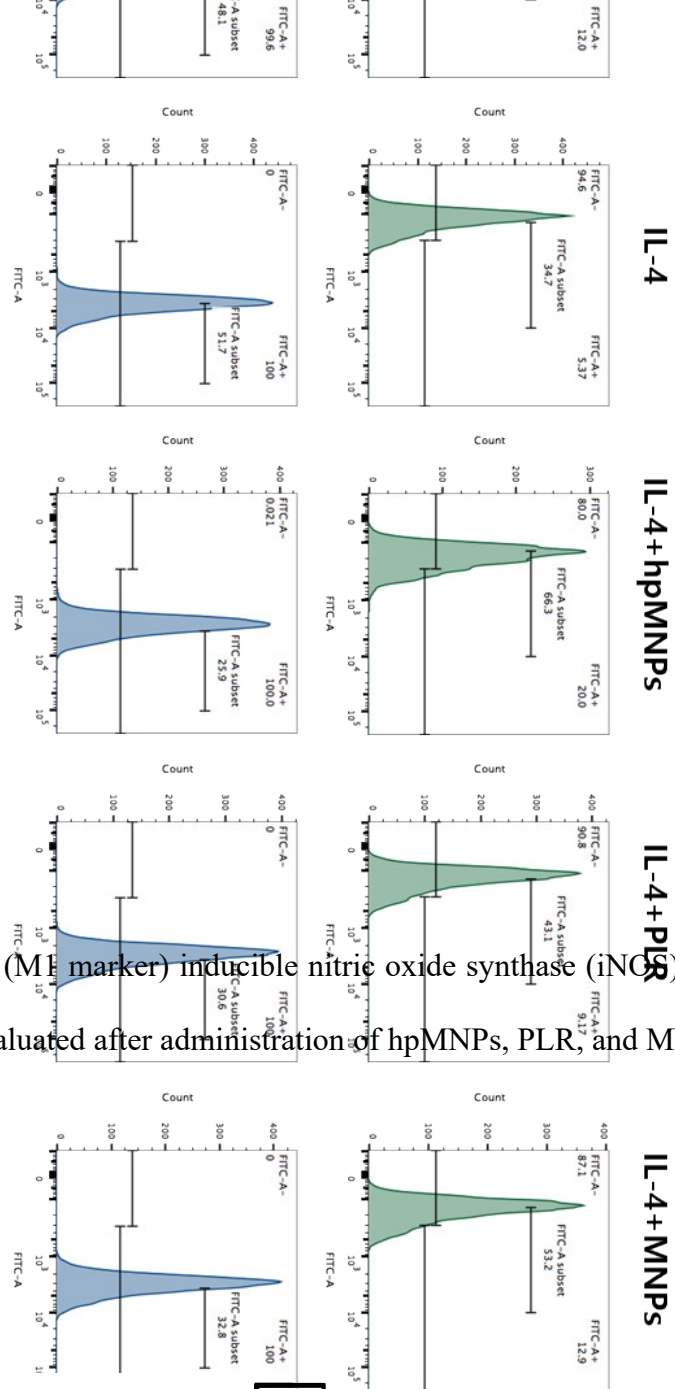

**Figure S3.** Flow cytometry analysis of (M1 marker) inducible nitric oxide synthase (iNOS) and (M2 marker) CD206 expression was evaluated after administration of hpMNPs, PLR, and MNPs.

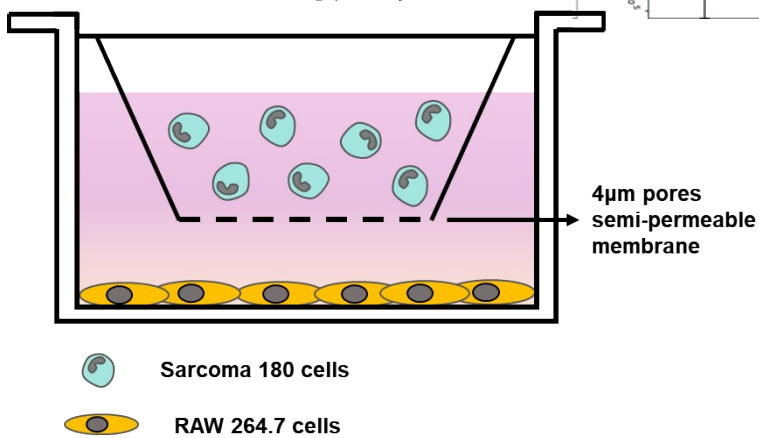

**Figure S4.** Schematic illustration of the transwell system.
